# Supplementary material for: Investigating linear and nonlinear viscoelastic behaviour and microstructures of gelatin-multiwalled carbon nanotube composites
Source: Royal Society of Chemistry journal article supplement (doi:10.1039/c5ra22744e), 2015-01-01

**Supporting information:**

Fig. S1 Gelatine adsorption onto MWNTs as a function of amount of amount of gelatine exposed to MWNTs.

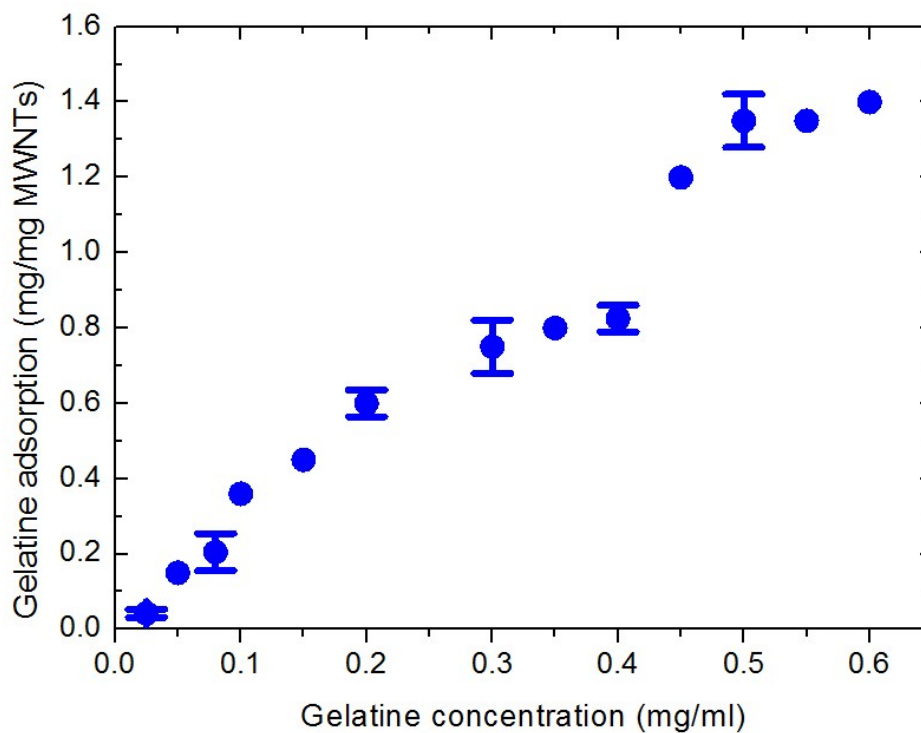

Fig. S2. Ordinary microscopy images of different concentration of MWNT dispersed in water after sonication at 750 W, 20% amplitude for 2.5 min.

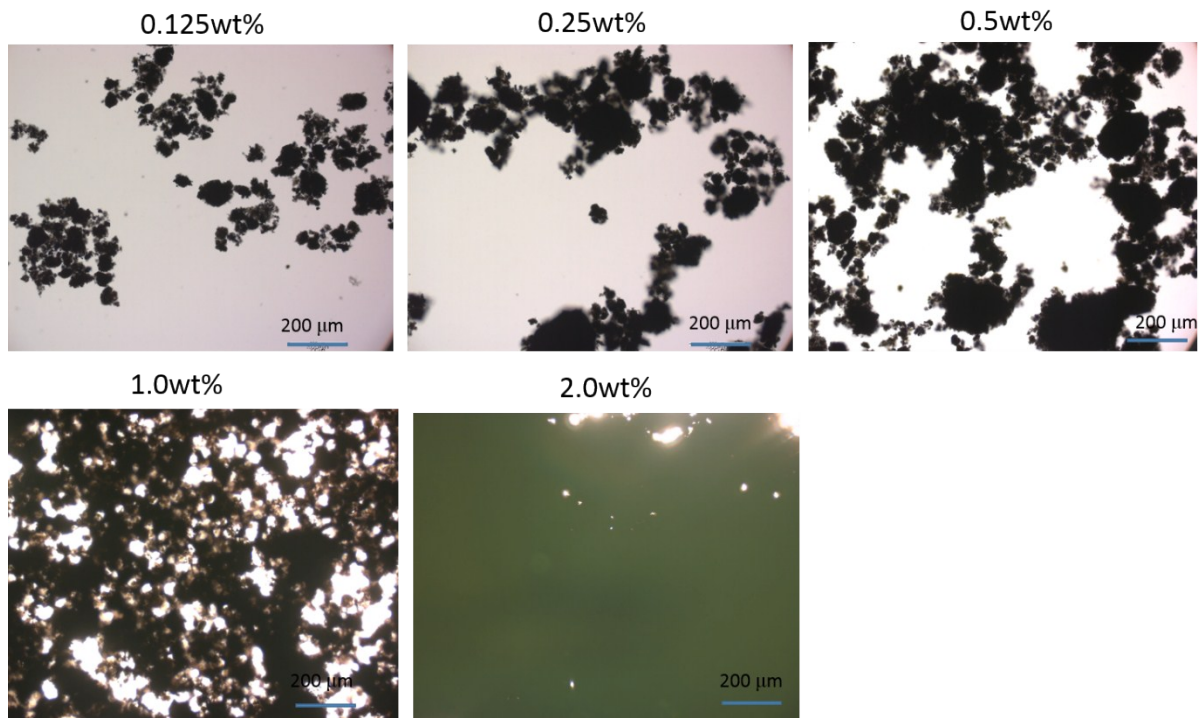

Fig. S3. Viscosity at a shear rate of  $10 \text{ s}^{-1}$  as a function of MWNT concentration. The viscosity measurements are conducted at  $25^\circ\text{C}$ . Solid lines are power-law fits. Error bars represent standard deviations

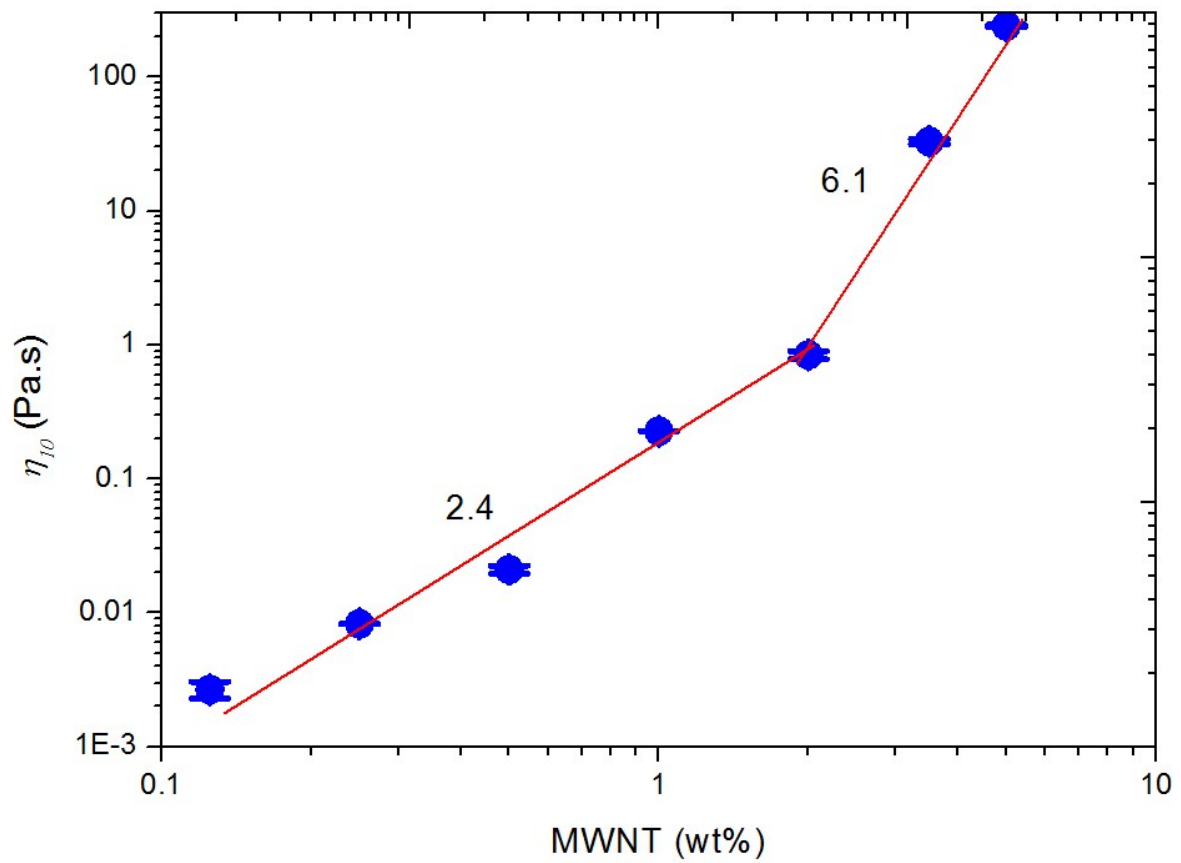

Supplement: c5ra22744e1.pdf [file c5ra22744e1.pdf]
